# Supplementary material for: More public health service providers are experiencing job burnout than clinical care providers in primary care facilities in China
Source: Hum Resour Health. 2020 Dec 3;18:95. doi: 10.1186/s12960-020-00538-z (PMC7711271; doi:10.1186/s12960-020-00538-z)
Supplement: Supplementary file 1 — Additional file 1. Roles of and services provided by clinical care and public health services providers. Additional file 1 presents a table showing the roles of and services provided by clinical care and public health services providers. [file 12960_2020_538_MOESM1_ESM.xls]

## Sheet: Supplementary Table 1
Additional file 1 : Table 1 Roles of and services provided by clinical care and public health services providers
	Clinical care providers	Public health providers
Roles	Clinical care providers are responsible for providing diagnosis and treatment of common or frequently-occurring diseases to residents, who seek basic clinical care at the primary care facilities that they work at, within or outside their catchment areas.	Public health providers are responsible for providing public health services required by the government to residents within the catchment areas of the primary care facilities that they work at.
Services	Basic clinical care includes outpatient and inpatient services. Before 2018, the service profile of basic clinical care provided in primary care facilities was unclear because no specific definition or disease-based list for common or frequently occurring diseases was established. In 2018, this scenario changed when the government published the standards for capacity building in delivering servic…	The profile of public health services were explicitly stated in policies. The latest 14-type package of basic public health services was published in 2017, and included establishing health records, health education, health management for children (0–6 years old), maternal health management, vaccination, reporting and handling of infectious diseases and public health emergencies, health management…
