# Supplementary material for: More public health service providers are experiencing job burnout than clinical care providers in primary care facilities in China
Source: Hum Resour Health. 2020 Dec 3;18:95. doi: 10.1186/s12960-020-00538-z (PMC7711271; doi:10.1186/s12960-020-00538-z)
Supplement: Supplementary file 3 — Additional file 3. Parameter coefficients and test of goodness-of-fit of multilevel models (null models). Additional file 3 presents a table showing the intra-class correlation coefficient in the null model and the goodness-of-fit indicator for each dependent variable. [file 12960_2020_538_MOESM3_ESM.xls]

## Sheet: Additional file 3 Table 1
Additional file 3: Table S1 Parameter coefficients and test of goodness-of-fit of multilevel models (null models)
Dependent variables	Fixed intercept	Random-effects (variance)		ICC1	LR2	LR test vs. linear regression(p-value)
	Constant (95% CI)	Constant (95 % CI)	Residual (95% CI)
Clinical care
Burnout	1.56 (1.53, 1.59)	0.10 (0.09, 0.12)	0.74 (0.72, 0.76)	0.12	-17553.1	<0.001
EE	1.91 (1.87, 1.95)	0.18 (0.15, 0.21)	1.41 (1.38, 1.44)	0.11	-21861	<0.001
DP	1.01 (0.98, 1.04)	0.10 (0.09, 0.12)	1.00 (0.97, 1.01)	0.09	-19471.5	<0.001
PA	4.39 (4.35, 4.43)	0.13 (0.11, 0.16)	1.71 (1.67, 1.76)	0.07	-23084.9	<0.001
Public health services
Burnout	1.81 (1.77, 1.86)	0.20 (0.16, 0.25)	0.84 (0.80, 0.88)	0.19	-6009.4	<0.001
EE	2.20 (2.14, 2.26)	0.36 (0.29, 0.43)	1.46 (1.39, 1.52)	0.2	-7193.2	<0.001
DP	1.25 (1.20, 1.30)	0.18 (0.14, 0.23)	1.23 (1.18, 1.29)	0.13	-6759.63	<0.001
PA	4.15 (4.10, 4.21)	0.21 (0.17, 0.27)	1.68 (1.61, 1.76)	0.11	-7403.89	<0.001
1ICC: Intra-class Correlation Coefficient 2LR: Log likelihood
